# Supplementary material
Source: ML conference proceedings conference paper supplement (https://openreview.net/forum?id=wYzc2UnQKt)
Supplement: supplementary_material [file attachment]

## A THE DPO FORMALISM

We denote the parsed text of document  $i$  by parser  $j$  as  $x_i^j = \phi_j(d_i)$  with accuracy (e.g., BLEU score)  $y_i^j$ . Hence, the dataset  $\mathcal{D} = \{(x_i, y_i)\}_{i=1}^N$  represents the (parsed) text inputs with  $\mathbb{R}^m$ -valued responses (i.e., a document-wise accuracy vector). We post-train a model to predict the accuracies of all parsers given the default parser’s text  $\phi_1^1$  in three steps. First, supervised fine-tuning yields the estimate  $\hat{\theta}_1$  through minimization of the  $\ell_2$  loss

$$\mathcal{L}_{\text{REG}}(\theta) = \mathbb{E}_{\mathcal{D}} [\|\pi_{\theta}(x^1) - y\|_2^2].$$

Second,  $\pi_{\hat{\theta}_1}$  is augmented into an encoder-decoder model  $g_{\varphi}$ , with  $\text{Enc}_{\varphi_e}(x) = h$  and  $\text{Dec}_{\varphi_d}(h) = z$ , where  $\varphi = (\varphi_e, \varphi_d)$  and  $\varphi_e := \hat{\theta}_1$  initially. We utilize a preference dataset  $\mathcal{D}_{\text{pref}} = \{(x_j^{k_1, +}, x_j^{k_2, -})\}_{j=1}^M$  of text pairs obtained through different parsers  $\phi_{k_1}$  and  $\phi_{k_2}$  where the former is preferred by the user. Minimizing

$$\mathcal{L}_{\text{DPO}} = -\mathbb{E}_{\mathcal{D}_{\text{pref}}} \left[ \log \sigma \left( \theta \log \frac{g_{\varphi}(x^+)}{g_{\varphi}^{\text{ref}}(x^+)} - \log \frac{g_{\varphi}(x^-)}{g_{\varphi}^{\text{ref}}(x^-)} \right) \right]$$

upon convergence yields the estimate  $\hat{\theta}_2 = \hat{\varphi}_e$ . Finally, the updated encoder is fine-tuned on  $\mathcal{D}$  with a lowered learning rate to obtain  $\hat{\theta}_3$  which produces the final model.

In our setting, the regression dataset contains  $N=29,200$  pairs, each consisting of a single document text and its associated BLEU score. The output dimension is  $m=6$ , since we predict the accuracy for each parser. The preference dataset contains  $M=712$  pairs. We found it advantageous in step 1 to predict pagewise accuracy (i.e., predict the accuracy of the given page’s parsed text), while the regression data in the third step are used to infer document-level accuracy based on the first page’s text, as processed by AdaParse.

## B QUANTIFICATION OF THE DPO IMPACT

We quantify the benefit of direct preference optimization (DPO) by evaluating a range of prediction models. As a baseline, we apply support vector classification (SVC) to metadata features (e.g., publisher, year of publication, PDF format, and producer). LLM-based prediction of the document text is performed with SciBERT, BERT, MiniLM, and SPECTER (Cohan et al., 2020; Wang et al., 2020). The metrics of the reference models (BLEU-maximal/minimal and random selection) are provided for context.

Given the six parsers, predicting the optimal choice for any PDF is challenging. The assignment of the BLEU-maximal parser to each document yields a BLEU score of 56.8%. Although metadata-driven classification delivers (mostly) favorable results, text-driven regression with LLMs outperforms them across all metrics. Post-training through DPO further boosts BLEU, CAR, and win rate. Transformer-based models pre-trained on extensive scientific corpora,

Table 4. Evaluation of various prediction models across different features. Word-level (BLEU, ROUGE) and character level accuracy (CAR) accuracies. WR=Win rate. All %.

| Features (Model)                       | BLEU        | ROUGE       | CAR         | WR          | ACC         |
|----------------------------------------|-------------|-------------|-------------|-------------|-------------|
| <b>CLS III: Document Text</b>          |             |             |             |             |             |
| Text (SciBERT + DPO)                   | <b>52.7</b> | 69.4        | <b>68.0</b> | <b>31.4</b> | 36.7        |
| Text (SciBERT)                         | 51.6        | <b>69.5</b> | 66.9        | 25.0        | <b>48.3</b> |
| Text (BERT)                            | 49.7        | 66.0        | 63.4        | 24.8        | 40.0        |
| <b>CLS II: Metadata and Title Text</b> |             |             |             |             |             |
| Title + Metadata (SPECTER)             | 47.9        | 64.5        | 62.9        | 25.2        | 18.1        |
| Title (SPECTER)                        | 46.4        | 63.3        | 61.8        | 26.2        | 15.2        |
| Title + Metadata (MiniLM-L6)           | 44.7        | 62.2        | 60.4        | 28.4        | 10.1        |
| <b>CLS I: Metadata</b>                 |             |             |             |             |             |
| Format + Producer (SVC)                | 47.7        | 64.0        | 60.2        | 28.5        | 14.6        |
| Format (SVC)                           | 47.5        | 64.1        | 60.7        | 29.5        | 16.6        |
| Year + Producer (SVC)                  | 47.3        | 63.7        | 60.1        | 28.8        | 14.8        |
| Publisher + (Sub-)category (SVC)       | 46.4        | 63.7        | 60.9        | 21.7        | 14.8        |
| (Sub-)category (SVC)                   | 43.6        | 63.5        | 62.5        | 24.9        | 12.9        |
| <b>Reference</b>                       |             |             |             |             |             |
| BLEU-maximal selection                 | 56.8        | 72.3        | 70.4        | 26.5        | 100.0       |
| Random selection                       | 44.0        | 61.7        | 57.4        | 20.5        | 16.7        |
| BLEU-minimal selection                 | 21.5        | 44.2        | 44.6        | 18.1        | 0.0         |

such as SciBERT and SPECTER, outperform models trained on conventional web-scale data like BERT and MiniLM-v6. AdaParse (LLM) leverages SciBERT with DPO post-training for parser selection.

## C SOLVING THE OPTIMIZATION PROBLEM

For scalability reasons, AdaParse limits itself to two parsers: PyMuPDF and Nougat. The problem turns to picking either  $\phi_{\text{Nougat}}$  or  $\phi_{\text{PyMuPDF}}$  for any document  $d_i$ . The average computational cost of a parser can be determined from our scaling experiments and is documented in the legend of Figure 3. They are denoted by  $\mathcal{T}_{\text{Nougat}}^{\text{avg}}$  and  $\mathcal{T}_{\text{PyMuPDF}}^{\text{avg}}$ . The parameter  $\alpha \in [0, 1]$  limits the fraction of documents parsed with Nougat. The constraint

$$\sum_{i=1}^n \mathcal{T}(\phi_{j_i}, d_i) \approx \alpha n \left( \mathcal{T}_{\text{Nougat}}^{\text{avg}} - \mathcal{T}_{\text{PyMuPDF}}^{\text{avg}} \right) + n \mathcal{T}_{\text{PyMuPDF}}^{\text{avg}} \leq \bar{\mathcal{T}}$$

is (approximately) satisfied for any

$$\alpha \leq \frac{\bar{\mathcal{T}} - n \mathcal{T}_{\text{PyMuPDF}}^{\text{avg}}}{n \left( \mathcal{T}_{\text{Nougat}}^{\text{avg}} - \mathcal{T}_{\text{PyMuPDF}}^{\text{avg}} \right)}.$$

The objective function is now maximized when sorting the documents (by expected accuracy improvement of Nougat over PyMuPDF) and allowing the first  $\lfloor \alpha n \rfloor$  documents to be parsed by Nougat. AdaParse conducts this on a per-batch basis to further increase throughput (i.e. for a batch of size  $k$  at most  $\lfloor \alpha k \rfloor$  documents will be parsed by Nougat). While this per-batch approach may yield a suboptimal solution, the optimality gap is negligible as the batch size is large (e.g.  $k=256$  in our case).

---

## D ARTIFACT APPENDIX

### D.1 Artifact check-list (meta-information)

- **Algorithm:** AdaParse
- **Program:** Python
- **Compilation:** Not applicable (pure Python)
- **Transformations:** YAML configuration for workflow
- **Binary:** N/A
- **Data set:** Arbitrary (zipped) PDFs provided by the user
- **Run-time environment:** Python 3.12, conda environment
- **Hardware:** GPU required
- **Execution:** Command-line interface
- **Metrics:** Throughput, accuracy of PDF parsing, and quality of parser outputs
- **Output:** N/A (functionality only)
- **Experiments:** Demonstrate functionality
- **How much disk space required (approximately)?:** Less than a few GBs for a small dataset
- **How much time is needed to prepare workflow (approximately)?:** 15–30 minutes for setup
- **How much time is needed to complete experiments (approximately)?:** 15 minutes per job
- **Publicly available?:** <https://github.com/7shoe/AdaParse>
- **Code licenses (if publicly available)?:** MIT License
- **Workflow framework used?:** Custom Python scripts integrated with PBS scheduling

### D.2 Installation

The steps below enable any of the parsers:

```
conda create -n adaparse python=3.12 -y
conda activate adaparse

# git repo (machine-agnostic)
git clone git@github.com:7shoe/AdaParse.git
cd AdaParse
pip install --upgrade pip setuptools wheel
pip install -e .
```

### D.3 Artifact Configuration File

The artifact requires adoption of the file in [https://github.com/7shoe/AdaParse/blob/main/examples/pymupdf/pymupdf\\_test.yaml](https://github.com/7shoe/AdaParse/blob/main/examples/pymupdf/pymupdf_test.yaml). In particular, ensure the paths `pdf_dir` and `out_dir` are valid. For example, the YAML file should include:

```
# The directory containing the pdfs
pdf_dir: {path_to_(zipped)_pdfs}

# The directory for converted texts
out_dir: {output_directory}

# The settings for the pdf parser
parser_settings:
  # The name of the parser to use
  name: pymupdf
```
